# Supplementary material for: Menopause induces changes to the stratum corneum ceramide profile, which are prevented by hormone replacement therapy
Source: PubMed Central journal article supplement (PMC9755298; doi:10.1038/s41598-022-26095-0), 2022-12-15
Supplement: 41598_2022_26095_MOESM1_ESM.pdf [file 41598_2022_26095_MOESM1_ESM.pdf]

## Supplementary material

### Menopause induces changes to the *stratum corneum* ceramide profile, which are prevented by hormone replacement therapy

Alexandra C. Kendall<sup>1§</sup>, Suzanne M. Pilkington<sup>2§</sup>, Jonathan R. Wray<sup>1</sup>, Victoria L. Newton<sup>3</sup>,  
Christopher E. M. Griffiths<sup>2,4</sup>, Mike Bell<sup>3</sup>, Rachel E. B. Watson<sup>2,4</sup> and Anna Nicolaou<sup>1,4,5\*</sup>

<sup>1</sup>Laboratory for Lipidomics and Lipid Biology, Division of Pharmacy and Optometry, School of Health Sciences, The University of Manchester, Manchester, United Kingdom.

<sup>2</sup>Division of Musculoskeletal and Dermatological Sciences, Centre for Dermatology Research, School of Biological Sciences, Faculty of Biology, Medicine, and Health, The University of Manchester, Manchester, United Kingdom.

<sup>3</sup>The No7 Beauty Company, Boots UK Ltd, Nottingham, United Kingdom.

<sup>4</sup>National Institute of Health Research Manchester Biomedical Research Centre, Manchester University NHS Foundation Trust, Manchester Academic Health Science Centre, Manchester, United Kingdom.

<sup>5</sup>Lydia Becker Institute of Immunology and Inflammation, Faculty of Biology, Medicine and Health, The University of Manchester, Manchester, United Kingdom.

§ These authors contributed equally to this work.

\* Corresponding author: Division of Pharmacy and Optometry, University of Manchester, 2.019C Stopford Building, Oxford Rd, M13 9PT Manchester, United Kingdom. E-mail: [anna.nicolaou@manchester.ac.uk](mailto:anna.nicolaou@manchester.ac.uk).

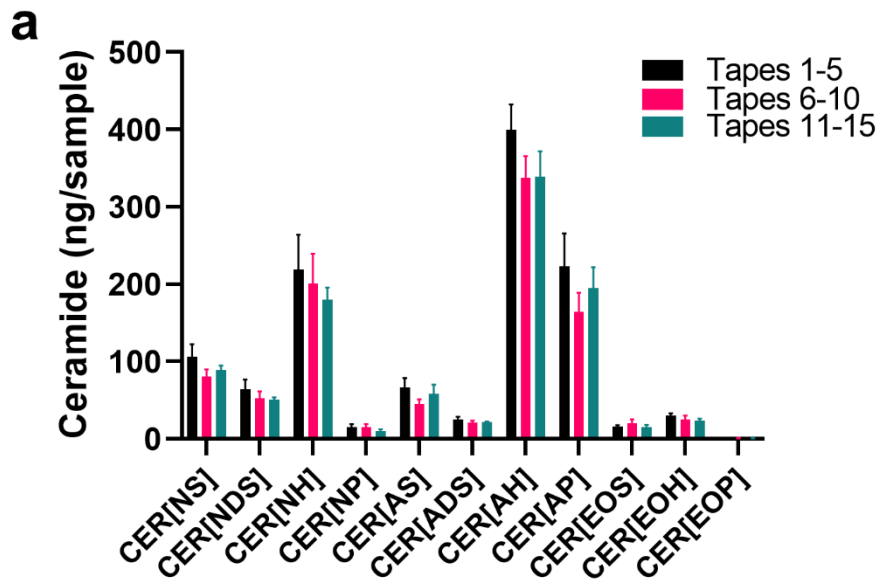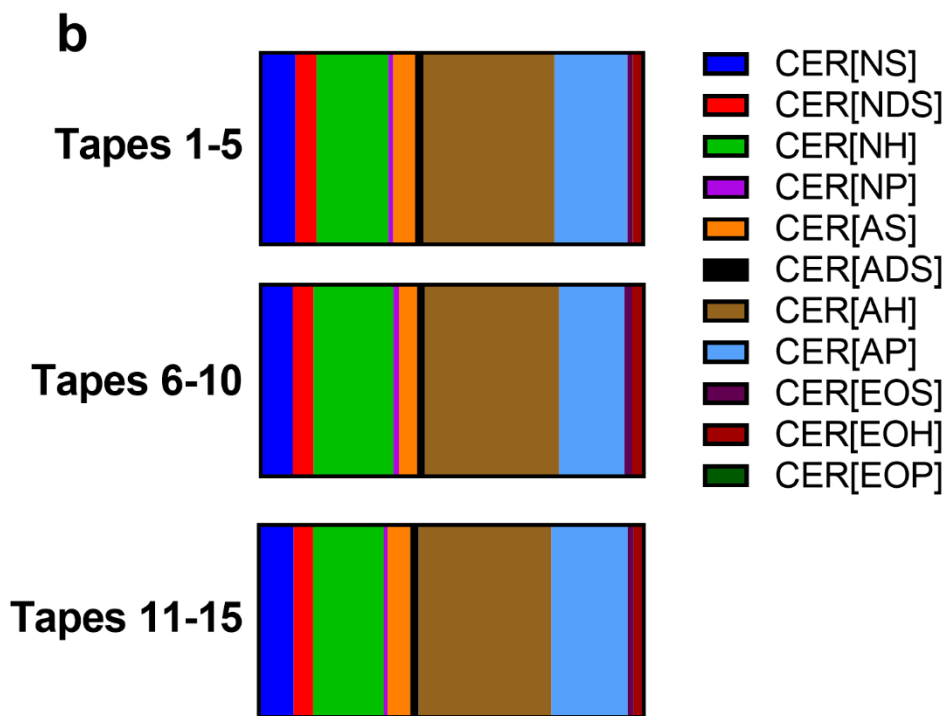

**Supplementary Figure S1. Ceramide profile is consistent throughout the first 15 layers of the stratum corneum.** Tape strips (15) were taken from facial skin (cheek, in duplicate). A third of each tape was used, with tapes 1-5, 6-10 and 11-15 pooled together for analysis. Ceramides were analysed by ultraperformance liquid chromatography with electrospray ionisation and tandem mass spectrometry, and grouped by ceramide class. Ceramide class data are presented as total amount per pooled sample (a), and as percentage of total ceramides (b). n=3 donors, two samples per donor.

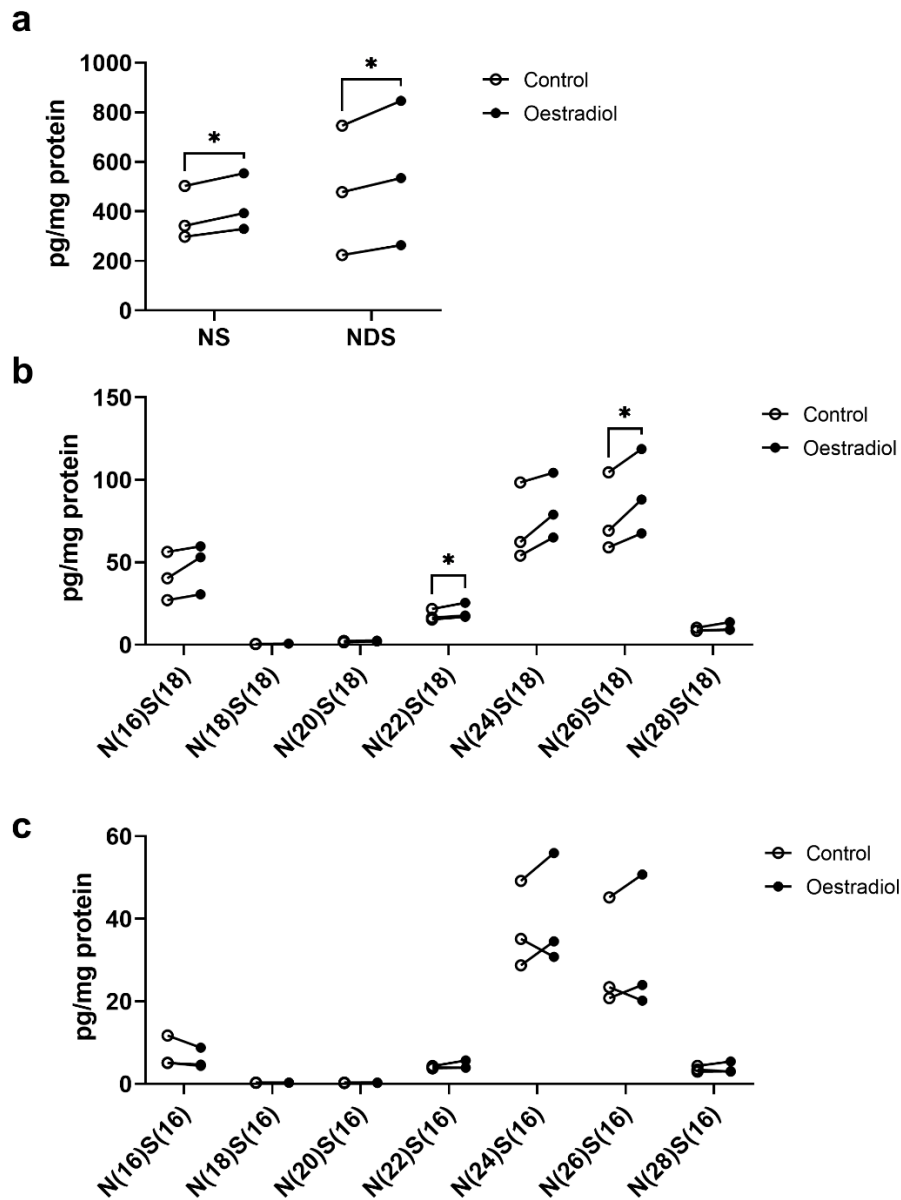

**Supplementary Figure S2. Oestradiol provided exogenously to differentiated primary human keratinocytes increases production of CER[NS] and CER[NDS].** Differentiating keratinocytes were treated with oestradiol (10 nM, 72 h). Individual ceramides were then extracted and analysed by ultraperformance liquid chromatography with electrospray ionisation and tandem mass spectrometry and grouped by ceramide class. Total CER[NS] and CER[NDS] are presented (a) as well as individual ceramides with a 18-carbon sphingosine base (b) and a 16-carbon sphingosine base (c). Data are presented as ng/mg protein. \*P < 0.05, analysed by ratio paired t-tests, n=3 different keratinocyte donors.

**Supplementary Table S1.** Solvent gradient for analysis of ceramides and sphingomyelins

| Time (min) | Mobile phase A (%) | Mobile phase B (%) | Ramp |
|------------|--------------------|--------------------|------|
| 0          | 40                 | 60                 | 6    |
| 6          | 40                 | 60                 | 6    |
| 9          | 4                  | 96                 | 6    |
| 20         | 0                  | 100                | 6    |
| 30         | 0                  | 100                | 6    |
| 32         | 40                 | 60                 | 6    |
| 40         | 40                 | 60                 | 6    |

**Supplementary Table S2.** Quantitation transitions and parameters for each ceramide analysed

| Class | Compound       | Precursor ion ( <i>m/z</i> ) | Product ion ( <i>m/z</i> ) | Collision energy (eV) | Cone voltage (V) |
|-------|----------------|------------------------------|----------------------------|-----------------------|------------------|
| ADS   | A(24)DS(16)    | 640.625                      | 256.4                      | 30                    | 30               |
| ADS   | A(26)DS(16)    | 668.656                      | 256.4                      | 30                    | 30               |
| ADS   | A(27)DS(16)    | 682.672                      | 256.4                      | 30                    | 30               |
| ADS   | A(24)DS(17)    | 654.64                       | 270.4                      | 30                    | 30               |
| ADS   | A(16)DS(18)-d9 | 565.603                      | 284.4                      | 30                    | 30               |
| ADS   | A(23)DS(18)    | 654.64                       | 284.4                      | 30                    | 30               |
| ADS   | A(24)DS(18)    | 668.656                      | 284.4                      | 30                    | 30               |
| ADS   | A(25)DS(18)    | 682.672                      | 284.4                      | 30                    | 30               |
| ADS   | A(26)DS(18)    | 696.687                      | 284.4                      | 30                    | 30               |
| ADS   | A(22)DS(19)    | 654.64                       | 298.4                      | 30                    | 30               |
| ADS   | A(24)DS(19)    | 682.672                      | 298.4                      | 30                    | 30               |
| ADS   | A(26)DS(19)    | 710.703                      | 298.4                      | 30                    | 30               |
| ADS   | A(18)DS(20)    | 612.573                      | 312.4                      | 30                    | 30               |
| ADS   | A(20)DS(20)    | 640.625                      | 312.4                      | 30                    | 30               |
| ADS   | A(23)DS(20)    | 682.672                      | 312.4                      | 30                    | 30               |
| ADS   | A(24)DS(20)    | 696.687                      | 312.4                      | 30                    | 30               |
| ADS   | A(25)DS(20)    | 710.703                      | 312.4                      | 30                    | 30               |
| ADS   | A(26)DS(20)    | 724.719                      | 312.4                      | 30                    | 30               |
| ADS   | A(24)DS(21)    | 710.703                      | 326.4                      | 30                    | 30               |
| ADS   | A(16)DS(22)    | 612.573                      | 340.4                      | 30                    | 30               |
| ADS   | A(18)DS(22)    | 640.625                      | 340.4                      | 30                    | 30               |
| ADS   | A(22)DS(22)    | 696.687                      | 340.4                      | 30                    | 30               |
| ADS   | A(23)DS(22)    | 710.703                      | 340.4                      | 30                    | 30               |
| ADS   | A(24)DS(22)    | 724.719                      | 340.4                      | 30                    | 30               |
| ADS   | A(18)DS(23)    | 654.64                       | 354.4                      | 30                    | 30               |
| ADS   | A(16)DS(24)    | 640.625                      | 368.4                      | 30                    | 30               |
| ADS   | A(18)DS(24)    | 668.656                      | 368.4                      | 30                    | 30               |
| ADS   | A(16)DS(25)    | 654.64                       | 382.4                      | 30                    | 30               |
| ADS   | A(16)DS(26)    | 668.656                      | 396.4                      | 30                    | 30               |
| AH    | A(24)H(14)     | 608.562                      | 224.4                      | 30                    | 30               |
| AH    | A(25)H(14)     | 622.577                      | 224.4                      | 30                    | 30               |

|    |               |         |       |    |    |
|----|---------------|---------|-------|----|----|
| AH | A(26)H(14)    | 636.593 | 224.4 | 30 | 30 |
| AH | A(28)H(14)    | 664.624 | 224.4 | 30 | 30 |
| AH | A(24)H(15)    | 622.577 | 238.4 | 30 | 30 |
| AH | A(26)H(15)    | 650.609 | 238.4 | 30 | 30 |
| AH | A(28)H(15)    | 678.64  | 238.4 | 30 | 30 |
| AH | A(22)H(16)    | 608.562 | 252.4 | 30 | 30 |
| AH | A(23)H(16)    | 622.577 | 252.4 | 30 | 30 |
| AH | A(24)H(16)    | 636.593 | 252.4 | 30 | 30 |
| AH | A(25)H(16)    | 650.609 | 252.4 | 30 | 30 |
| AH | A(26)H(16)    | 664.624 | 252.4 | 30 | 30 |
| AH | A(27)H(16)    | 678.64  | 252.4 | 30 | 30 |
| AH | A(28)H(16)    | 692.655 | 252.4 | 30 | 30 |
| AH | A(22)H(17)    | 622.577 | 266.4 | 30 | 30 |
| AH | A(24)H(17)    | 650.609 | 266.4 | 30 | 30 |
| AH | A(26)H(17)    | 678.64  | 266.4 | 30 | 30 |
| AH | A(28)H(17)    | 706.671 | 266.4 | 30 | 30 |
| AH | A(16)H(18)-d9 | 561.587 | 280.4 | 30 | 30 |
| AH | A(20)H(18)    | 608.562 | 280.4 | 30 | 30 |
| AH | A(22)H(18)    | 636.593 | 280.4 | 30 | 30 |
| AH | A(24)H(18)    | 664.624 | 280.4 | 30 | 30 |
| AH | A(25)H(18)    | 678.64  | 280.4 | 30 | 30 |
| AH | A(26)H(18)    | 692.655 | 280.4 | 30 | 30 |
| AH | A(27)H(18)    | 706.671 | 280.4 | 30 | 30 |
| AH | A(28)H(18)    | 720.687 | 280.4 | 30 | 30 |
| AH | A(29)H(18)    | 734.702 | 280.4 | 30 | 30 |
| AH | A(30)H(18)    | 748.718 | 280.4 | 30 | 30 |
| AH | A(24)H(19)    | 678.64  | 294.4 | 30 | 30 |
| AH | A(26)H(19)    | 706.671 | 294.4 | 30 | 30 |
| AH | A(28)H(19)    | 734.702 | 294.4 | 30 | 30 |
| AH | A(24)H(20)    | 692.655 | 308.4 | 30 | 30 |
| AH | A(25)H(20)    | 706.671 | 308.4 | 30 | 30 |
| AH | A(26)H(20)    | 720.687 | 308.4 | 30 | 30 |
| AH | A(27)H(20)    | 734.702 | 308.4 | 30 | 30 |
| AH | A(28)H(20)    | 748.718 | 308.4 | 30 | 30 |
| AH | A(26)H(21)    | 734.702 | 322.4 | 30 | 30 |
| AH | A(24)H(22)    | 720.687 | 336.4 | 30 | 30 |
| AH | A(26)H(22)    | 748.718 | 336.4 | 30 | 30 |
| AP | A(22)P(16)    | 628.588 | 254.4 | 30 | 30 |
| AP | A(24)P(16)    | 656.62  | 254.4 | 30 | 30 |
| AP | A(26)P(16)    | 684.651 | 254.4 | 30 | 30 |
| AP | A(24)P(17)    | 670.635 | 268.4 | 30 | 30 |
| AP | A(26)P(17)    | 698.666 | 268.4 | 30 | 30 |
| AP | A(16)P(18)-d9 | 581.629 | 282.4 | 30 | 30 |
| AP | A(22)P(18)    | 656.62  | 282.4 | 30 | 30 |
| AP | A(24)P(18)    | 684.651 | 282.4 | 30 | 30 |
| AP | A(25)P(18)    | 698.666 | 282.4 | 30 | 30 |

|     |                   |          |       |    |    |
|-----|-------------------|----------|-------|----|----|
| AP  | A(26)P(18)        | 712.682  | 282.4 | 30 | 30 |
| AP  | A(22)P(19)        | 670.635  | 296.4 | 30 | 30 |
| AP  | A(24)P(19)        | 698.666  | 296.4 | 30 | 30 |
| AP  | A(26)P(19)        | 726.698  | 324.4 | 30 | 30 |
| AP  | A(20)P(20)        | 656.62   | 310.4 | 30 | 30 |
| AP  | A(22)P(20)        | 684.651  | 310.4 | 30 | 30 |
| AP  | A(24)P(20)        | 712.682  | 310.4 | 30 | 30 |
| AP  | A(25)P(20)        | 726.698  | 296.4 | 30 | 30 |
| AP  | A(26)P(20)        | 740.713  | 310.4 | 30 | 30 |
| AP  | A(24)P(21)        | 726.698  | 310.4 | 30 | 30 |
| AP  | A(24)P(22)        | 740.713  | 338.4 | 30 | 30 |
| AP  | A(26)P(22)        | 754.729  | 338.4 | 30 | 30 |
| AS  | A(24)S(16)        | 638.609  | 236.4 | 30 | 30 |
| AS  | A(25)S(16)        | 652.625  | 236.4 | 30 | 30 |
| AS  | A(26)S(16)        | 666.64   | 236.4 | 30 | 30 |
| AS  | A(27)S(16)        | 680.656  | 236.4 | 30 | 30 |
| AS  | A(24)S(17)        | 652.625  | 250.4 | 30 | 30 |
| AS  | A(26)S(17)        | 680.656  | 250.4 | 30 | 30 |
| AS  | A(16)S(18)-d9     | 545.561  | 264.4 | 30 | 30 |
| AS  | A(23)S(18)        | 652.625  | 264.4 | 30 | 30 |
| AS  | A(24)S(18)        | 666.64   | 264.4 | 30 | 30 |
| AS  | A(25)S(18)        | 680.656  | 264.4 | 30 | 30 |
| AS  | A(26)S(18)        | 694.672  | 264.4 | 30 | 30 |
| AS  | A(27)S(18)        | 708.687  | 264.4 | 30 | 30 |
| AS  | A(24)S(19)        | 680.656  | 278.4 | 30 | 30 |
| AS  | A(26)S(19)        | 708.687  | 278.4 | 30 | 30 |
| AS  | A(28)S(19)        | 736.718  | 278.4 | 30 | 30 |
| AS  | A(23)S(20)        | 680.656  | 292.4 | 30 | 30 |
| AS  | A(24)S(20)        | 694.672  | 292.4 | 30 | 30 |
| AS  | A(26)S(20)        | 722.703  | 292.4 | 30 | 30 |
| AS  | A(22)S(21)        | 680.656  | 306.4 | 30 | 30 |
| AS  | A(24)S(21)        | 708.687  | 306.4 | 30 | 30 |
| AS  | A(23)S(22)        | 708.687  | 320.4 | 30 | 30 |
| AS  | A(24)S(22)        | 722.703  | 320.4 | 30 | 30 |
| AS  | A(25)S(22)        | 736.718  | 320.4 | 30 | 30 |
| AS  | A(26)S(22)        | 750.734  | 320.4 | 30 | 30 |
| EOH | E(18:2)O(30)H(18) | 1010.948 | 280.4 | 40 | 30 |
| EOH | E(18:2)O(31)H(18) | 1024.963 | 280.4 | 40 | 30 |
| EOH | E(18:2)O(32)H(18) | 1038.979 | 280.4 | 40 | 30 |
| EOH | E(18:2)O(30)H(19) | 1024.963 | 294.4 | 40 | 30 |
| EOH | E(18:2)O(32)H(19) | 1052.995 | 294.4 | 40 | 30 |
| EOH | E(18:2)O(28)H(20) | 1010.948 | 308.4 | 40 | 30 |
| EOH | E(18:2)O(29)H(20) | 1024.963 | 308.4 | 40 | 30 |
| EOH | E(18:2)O(30)H(20) | 1038.979 | 308.4 | 40 | 30 |
| EOH | E(18:2)O(31)H(20) | 1052.995 | 308.4 | 40 | 30 |
| EOH | E(18:2)O(32)H(20) | 1067.01  | 308.4 | 40 | 30 |

|     |                      |          |       |    |    |
|-----|----------------------|----------|-------|----|----|
| EOH | E(18:2)O(30)H(21)    | 1052.995 | 322.4 | 40 | 30 |
| EOH | E(18:2)O(30)H(22)    | 1067.01  | 336.4 | 40 | 30 |
| EOP | E(18:1)O(26)P(18)-d9 | 986.031  | 282.4 | 45 | 30 |
| EOP | E(18:2)O(32)P(18)    | 1059.006 | 282.4 | 45 | 30 |
| EOP | E(18:2)O(30)P(20)    | 1059.006 | 310.4 | 45 | 30 |
| EOP | E(18:2)O(31)P(20)    | 1073.021 | 310.4 | 45 | 30 |
| EOP | E(18:2)O(32)P(20)    | 1087.037 | 310.4 | 45 | 30 |
| EOP | E(18:2)O(30)P(21)    | 1073.021 | 324.4 | 45 | 30 |
| EOP | E(18:2)O(28)P(22)    | 1059.006 | 338.4 | 45 | 30 |
| EOP | E(18:2)O(29)P(22)    | 1073.021 | 338.4 | 45 | 30 |
| EOP | E(18:2)O(30)P(22)    | 1087.037 | 338.4 | 45 | 30 |
| EOS | E(18:1)O(26)S(18)-d9 | 967.973  | 264.4 | 45 | 30 |
| EOS | E(18:2)O(30)S(18)    | 1012.964 | 264.4 | 45 | 30 |
| EOS | E(18:2)O(30)S(19)    | 1026.979 | 278.4 | 45 | 30 |
| EOS | E(18:2)O(32)S(19)    | 1055.011 | 278.4 | 45 | 30 |
| EOS | E(18:2)O(29)S(20)    | 1026.979 | 292.4 | 45 | 30 |
| EOS | E(18:2)O(30)S(20)    | 1040.995 | 292.4 | 45 | 30 |
| EOS | E(18:2)O(31)S(20)    | 1055.011 | 292.4 | 45 | 30 |
| EOS | E(18:2)O(32)S(20)    | 1069.026 | 292.4 | 45 | 30 |
| EOS | E(18:2)O(30)S(21)    | 1055.011 | 306.4 | 45 | 30 |
| EOS | E(18:2)O(28)S(22)    | 1040.995 | 320.4 | 45 | 30 |
| EOS | E(18:2)O(30)S(22)    | 1069.026 | 320.4 | 45 | 30 |
| NDS | N(24)DS(16)          | 624.63   | 256.4 | 30 | 30 |
| NDS | N(25)DS(16)          | 638.646  | 256.4 | 30 | 30 |
| NDS | N(26)DS(16)          | 652.661  | 256.4 | 30 | 30 |
| NDS | N(24)DS(17)          | 638.646  | 270.4 | 30 | 30 |
| NDS | N(26)DS(17)          | 666.677  | 270.4 | 30 | 30 |
| NDS | N(28)DS(17)          | 694.708  | 270.4 | 30 | 30 |
| NDS | N(16)DS(18)-d9       | 549.592  | 284.4 | 30 | 30 |
| NDS | N(22)DS(18)          | 624.63   | 284.4 | 30 | 30 |
| NDS | N(23)DS(18)          | 638.646  | 284.4 | 30 | 30 |
| NDS | N(24)DS(18)          | 652.661  | 284.4 | 30 | 30 |
| NDS | N(25)DS(18)          | 666.677  | 284.4 | 30 | 30 |
| NDS | N(26)DS(18)          | 680.692  | 284.4 | 30 | 30 |
| NDS | N(27)DS(18)          | 694.708  | 284.4 | 30 | 30 |
| NDS | N(28)DS(18)          | 708.724  | 284.4 | 30 | 30 |
| NDS | N(22)DS(19)          | 638.646  | 298.4 | 30 | 30 |
| NDS | N(24)DS(19)          | 666.677  | 298.4 | 30 | 30 |
| NDS | N(26)DS(19)          | 694.708  | 298.4 | 30 | 30 |
| NDS | N(28)DS(19)          | 722.739  | 298.4 | 30 | 30 |
| NDS | N(20)DS(20)          | 624.63   | 312.4 | 30 | 30 |
| NDS | N(23)DS(20)          | 666.677  | 312.4 | 30 | 30 |
| NDS | N(24)DS(20)          | 680.692  | 312.4 | 30 | 30 |
| NDS | N(25)DS(20)          | 694.708  | 312.4 | 30 | 30 |
| NDS | N(26)DS(20)          | 708.724  | 312.4 | 30 | 30 |
| NDS | N(27)DS(20)          | 722.739  | 312.4 | 30 | 30 |

|     |             |         |       |    |    |
|-----|-------------|---------|-------|----|----|
| NDS | N(28)DS(20) | 736.755 | 312.4 | 30 | 30 |
| NDS | N(29)DS(20) | 750.771 | 312.4 | 35 | 30 |
| NDS | N(30)DS(20) | 764.786 | 312.4 | 35 | 30 |
| NDS | N(24)DS(21) | 694.708 | 326.4 | 30 | 30 |
| NDS | N(26)DS(21) | 722.739 | 326.4 | 30 | 30 |
| NDS | N(28)DS(21) | 750.771 | 326.4 | 35 | 30 |
| NDS | N(30)DS(21) | 778.802 | 326.4 | 35 | 30 |
| NDS | N(18)DS(22) | 624.63  | 340.4 | 30 | 30 |
| NDS | N(20)DS(22) | 652.661 | 340.4 | 30 | 30 |
| NDS | N(22)DS(22) | 680.692 | 340.4 | 30 | 30 |
| NDS | N(23)DS(22) | 694.708 | 340.4 | 30 | 30 |
| NDS | N(24)DS(22) | 708.724 | 340.4 | 30 | 30 |
| NDS | N(25)DS(22) | 722.739 | 340.4 | 30 | 30 |
| NDS | N(26)DS(22) | 736.755 | 340.4 | 30 | 30 |
| NDS | N(27)DS(22) | 750.771 | 340.4 | 35 | 30 |
| NDS | N(28)DS(22) | 764.786 | 340.4 | 35 | 30 |
| NDS | N(29)DS(22) | 778.802 | 340.4 | 35 | 30 |
| NDS | N(30)DS(22) | 792.818 | 340.4 | 35 | 30 |
| NDS | N(22)DS(23) | 694.708 | 354.4 | 30 | 30 |
| NDS | N(24)DS(23) | 722.739 | 354.4 | 30 | 30 |
| NDS | N(26)DS(23) | 750.771 | 354.4 | 35 | 30 |
| NDS | N(28)DS(23) | 778.802 | 354.4 | 35 | 30 |
| NDS | N(16)DS(24) | 624.63  | 368.4 | 30 | 30 |
| NDS | N(18)DS(24) | 652.661 | 368.4 | 30 | 30 |
| NDS | N(20)DS(24) | 680.692 | 368.4 | 30 | 30 |
| NDS | N(22)DS(24) | 708.724 | 368.4 | 30 | 30 |
| NDS | N(23)DS(24) | 722.739 | 368.4 | 30 | 30 |
| NDS | N(24)DS(24) | 736.755 | 368.4 | 30 | 30 |
| NDS | N(25)DS(24) | 750.771 | 368.4 | 35 | 30 |
| NDS | N(26)DS(24) | 764.786 | 368.4 | 35 | 30 |
| NDS | N(27)DS(24) | 778.802 | 368.4 | 35 | 30 |
| NDS | N(28)DS(24) | 792.818 | 368.4 | 35 | 30 |
| NDS | N(29)DS(24) | 806.833 | 368.4 | 35 | 30 |
| NDS | N(30)DS(24) | 820.849 | 368.4 | 35 | 30 |
| NDS | N(22)DS(25) | 722.739 | 382.4 | 30 | 30 |
| NDS | N(24)DS(25) | 750.771 | 382.4 | 35 | 30 |
| NDS | N(26)DS(25) | 778.802 | 382.4 | 35 | 30 |
| NDS | N(28)DS(25) | 806.833 | 382.4 | 35 | 30 |
| NDS | N(16)DS(26) | 652.661 | 396.4 | 30 | 30 |
| NDS | N(18)DS(26) | 680.692 | 396.4 | 30 | 30 |
| NDS | N(20)DS(26) | 708.724 | 396.4 | 30 | 30 |
| NDS | N(22)DS(26) | 736.755 | 396.4 | 30 | 30 |
| NDS | N(23)DS(26) | 750.771 | 396.4 | 35 | 30 |
| NDS | N(24)DS(26) | 764.786 | 396.4 | 35 | 30 |
| NDS | N(25)DS(26) | 778.802 | 396.4 | 35 | 30 |
| NDS | N(26)DS(26) | 792.818 | 396.4 | 35 | 30 |



|     |               |         |       |    |    |
|-----|---------------|---------|-------|----|----|
| NDS | N(27)DS(26)   | 806.833 | 396.4 | 35 | 30 |
| NDS | N(28)DS(26)   | 820.849 | 396.4 | 35 | 30 |
| NDS | N(22)DS(27)   | 750.771 | 410.4 | 35 | 30 |
| NDS | N(24)DS(27)   | 778.802 | 410.4 | 35 | 30 |
| NDS | N(26)DS(27)   | 806.833 | 410.4 | 35 | 30 |
| NDS | N(26)DS(28)   | 820.849 | 424.4 | 35 | 30 |
| NH  | N(26)H(14)    | 620.597 | 252.4 | 30 | 30 |
| NH  | N(26)H(15)    | 634.614 | 238.4 | 30 | 30 |
| NH  | N(24)H(16)    | 620.597 | 224.4 | 30 | 30 |
| NH  | N(25)H(16)    | 634.614 | 252.4 | 30 | 30 |
| NH  | N(26)H(16)    | 648.629 | 252.4 | 30 | 30 |
| NH  | N(28)H(16)    | 676.661 | 252.4 | 30 | 30 |
| NH  | N(24)H(17)    | 634.614 | 266.4 | 30 | 30 |
| NH  | N(26)H(17)    | 662.645 | 266.4 | 30 | 30 |
| NH  | N(28)H(17)    | 690.676 | 266.4 | 30 | 30 |
| NH  | N(16)H(18)-d9 | 545.615 | 280.4 | 30 | 30 |
| NH  | N(23)H(18)    | 634.614 | 280.4 | 30 | 30 |
| NH  | N(24)H(18)    | 648.629 | 280.4 | 30 | 30 |
| NH  | N(25)H(18)    | 662.645 | 280.4 | 30 | 30 |
| NH  | N(26)H(18)    | 676.661 | 280.4 | 30 | 30 |
| NH  | N(27)H(18)    | 690.676 | 280.4 | 30 | 30 |
| NH  | N(28)H(18)    | 704.692 | 280.4 | 30 | 30 |
| NH  | N(30)H(18)    | 732.723 | 280.4 | 30 | 30 |
| NH  | N(26)H(19)    | 690.676 | 294.4 | 30 | 30 |
| NH  | N(28)H(19)    | 718.707 | 294.4 | 30 | 30 |
| NH  | N(30)H(19)    | 746.739 | 294.4 | 30 | 30 |
| NH  | N(24)H(20)    | 676.661 | 308.4 | 30 | 30 |
| NH  | N(25)H(20)    | 690.676 | 308.4 | 30 | 30 |
| NH  | N(26)H(20)    | 704.692 | 308.4 | 30 | 30 |
| NH  | N(27)H(20)    | 718.707 | 308.4 | 30 | 30 |
| NH  | N(28)H(20)    | 732.723 | 308.4 | 30 | 30 |
| NH  | N(29)H(20)    | 746.739 | 308.4 | 30 | 30 |
| NH  | N(30)H(20)    | 760.754 | 308.4 | 35 | 30 |
| NH  | N(26)H(21)    | 718.707 | 322.4 | 30 | 30 |
| NH  | N(28)H(21)    | 746.739 | 322.4 | 30 | 30 |
| NH  | N(26)H(22)    | 732.723 | 336.4 | 30 | 30 |
| NH  | N(28)H(22)    | 760.754 | 336.4 | 35 | 30 |
| NP  | N(24)P(16)    | 640.625 | 254.4 | 30 | 30 |
| NP  | N(26)P(16)    | 668.656 | 254.4 | 30 | 30 |
| NP  | N(28)P(16)    | 696.687 | 254.4 | 30 | 30 |
| NP  | N(24)P(17)    | 654.64  | 268.4 | 30 | 30 |
| NP  | N(26)P(17)    | 682.672 | 268.4 | 30 | 30 |
| NP  | N(28)P(17)    | 710.703 | 268.4 | 30 | 30 |
| NP  | N(16)P(18)-d9 | 565.65  | 282.4 | 30 | 30 |
| NP  | N(24)P(18)    | 668.656 | 282.4 | 30 | 30 |
| NP  | N(25)P(18)    | 682.672 | 282.4 | 30 | 30 |

|    |               |         |       |    |    |
|----|---------------|---------|-------|----|----|
| NP | N(26)P(18)    | 696.687 | 282.4 | 30 | 30 |
| NP | N(27)P(18)    | 710.703 | 282.4 | 30 | 30 |
| NP | N(28)P(18)    | 724.718 | 282.4 | 30 | 30 |
| NP | N(24)P(19)    | 682.672 | 296.4 | 30 | 30 |
| NP | N(26)P(19)    | 710.703 | 296.4 | 30 | 30 |
| NP | N(23)P(20)    | 682.672 | 310.4 | 30 | 30 |
| NP | N(24)P(20)    | 696.687 | 310.4 | 30 | 30 |
| NP | N(25)P(20)    | 710.703 | 310.4 | 30 | 30 |
| NP | N(26)P(20)    | 724.718 | 310.4 | 30 | 30 |
| NP | N(28)P(20)    | 752.75  | 310.4 | 35 | 30 |
| NP | N(30)P(20)    | 780.781 | 310.4 | 35 | 30 |
| NP | N(24)P(21)    | 710.703 | 324.4 | 30 | 30 |
| NP | N(26)P(21)    | 738.734 | 324.4 | 30 | 30 |
| NP | N(28)P(21)    | 766.765 | 324.4 | 35 | 30 |
| NP | N(30)P(21)    | 794.797 | 324.4 | 35 | 30 |
| NP | N(24)P(22)    | 724.718 | 338.4 | 30 | 30 |
| NP | N(25)P(22)    | 738.734 | 338.4 | 30 | 30 |
| NP | N(26)P(22)    | 752.75  | 338.4 | 35 | 30 |
| NP | N(27)P(22)    | 766.765 | 338.4 | 35 | 30 |
| NP | N(28)P(22)    | 780.781 | 338.4 | 35 | 30 |
| NP | N(29)P(22)    | 794.797 | 338.4 | 35 | 30 |
| NP | N(30)P(22)    | 808.812 | 338.4 | 35 | 30 |
| NP | N(26)P(23)    | 766.765 | 352.4 | 35 | 30 |
| NP | N(28)P(23)    | 794.797 | 352.4 | 35 | 30 |
| NP | N(24)P(24)    | 752.75  | 366.4 | 35 | 30 |
| NP | N(26)P(24)    | 780.781 | 366.4 | 35 | 30 |
| NP | N(27)P(24)    | 794.797 | 366.4 | 35 | 30 |
| NP | N(28)P(24)    | 808.812 | 366.4 | 35 | 30 |
| NP | N(26)P(25)    | 794.797 | 380.4 | 35 | 30 |
| NP | N(24)P(26)    | 780.781 | 394.4 | 35 | 30 |
| NP | N(26)P(26)    | 808.812 | 394.4 | 35 | 30 |
| NS | N(24)S(16)    | 622.614 | 236.4 | 30 | 30 |
| NS | N(25)S(16)    | 636.63  | 236.4 | 30 | 30 |
| NS | N(26)S(16)    | 650.645 | 236.4 | 30 | 30 |
| NS | N(27)S(16)    | 664.661 | 236.4 | 30 | 30 |
| NS | N(28)S(16)    | 678.677 | 236.4 | 30 | 30 |
| NS | N(24)S(17)    | 636.63  | 250.4 | 30 | 30 |
| NS | N(26)S(17)    | 664.661 | 250.4 | 30 | 30 |
| NS | N(28)S(17)    | 692.692 | 250.4 | 30 | 30 |
| NS | N(16)S(18)-d9 | 529.566 | 264.4 | 30 | 30 |
| NS | N(22)S(18)    | 622.614 | 264.4 | 30 | 30 |
| NS | N(23)S(18)    | 636.63  | 264.4 | 30 | 30 |
| NS | N(24)S(18)    | 650.645 | 264.4 | 30 | 30 |
| NS | N(25)S(18)    | 664.661 | 264.4 | 30 | 30 |
| NS | N(26)S(18)    | 678.677 | 264.4 | 30 | 30 |
| NS | N(27)S(18)    | 692.692 | 264.4 | 30 | 30 |

|    |            |         |       |    |    |
|----|------------|---------|-------|----|----|
| NS | N(28)S(18) | 706.708 | 264.4 | 30 | 30 |
| NS | N(29)S(18) | 720.724 | 264.4 | 30 | 30 |
| NS | N(22)S(19) | 636.63  | 278.4 | 30 | 30 |
| NS | N(24)S(19) | 664.661 | 278.4 | 30 | 30 |
| NS | N(26)S(19) | 692.692 | 278.4 | 30 | 30 |
| NS | N(28)S(19) | 720.724 | 278.4 | 30 | 30 |
| NS | N(21)S(20) | 636.63  | 292.4 | 30 | 30 |
| NS | N(22)S(20) | 650.645 | 292.4 | 30 | 30 |
| NS | N(23)S(20) | 664.661 | 292.4 | 30 | 30 |
| NS | N(24)S(20) | 678.677 | 292.4 | 30 | 30 |
| NS | N(25)S(20) | 692.692 | 292.4 | 30 | 30 |
| NS | N(26)S(20) | 706.708 | 292.4 | 30 | 30 |
| NS | N(27)S(20) | 720.724 | 292.4 | 30 | 30 |
| NS | N(28)S(20) | 734.739 | 292.4 | 30 | 30 |
| NS | N(29)S(20) | 748.755 | 292.4 | 30 | 30 |
| NS | N(30)S(20) | 762.771 | 292.4 | 35 | 30 |
| NS | N(22)S(21) | 664.661 | 306.4 | 30 | 30 |
| NS | N(24)S(21) | 692.692 | 306.4 | 30 | 30 |
| NS | N(26)S(21) | 720.724 | 306.4 | 30 | 30 |
| NS | N(28)S(21) | 748.755 | 306.4 | 30 | 30 |
| NS | N(30)S(21) | 776.786 | 306.4 | 35 | 30 |
| NS | N(20)S(22) | 650.645 | 320.4 | 30 | 30 |
| NS | N(22)S(22) | 678.677 | 320.4 | 30 | 30 |
| NS | N(23)S(22) | 692.692 | 320.4 | 30 | 30 |
| NS | N(24)S(22) | 706.708 | 320.4 | 30 | 30 |
| NS | N(25)S(22) | 720.724 | 320.4 | 30 | 30 |
| NS | N(26)S(22) | 734.739 | 320.4 | 30 | 30 |
| NS | N(27)S(22) | 748.755 | 320.4 | 30 | 30 |
| NS | N(28)S(22) | 762.771 | 320.4 | 35 | 30 |
| NS | N(29)S(22) | 776.786 | 320.4 | 35 | 30 |
| NS | N(30)S(22) | 790.802 | 320.4 | 35 | 30 |
| NS | N(24)S(23) | 720.724 | 334.4 | 30 | 30 |
| NS | N(26)S(23) | 748.755 | 334.4 | 30 | 30 |
| NS | N(28)S(23) | 776.786 | 334.4 | 35 | 30 |
| NS | N(22)S(24) | 706.708 | 348.4 | 30 | 30 |
| NS | N(23)S(24) | 720.724 | 348.4 | 30 | 30 |
| NS | N(24)S(24) | 734.739 | 348.4 | 30 | 30 |
| NS | N(25)S(24) | 748.755 | 348.4 | 30 | 30 |
| NS | N(26)S(24) | 762.771 | 348.4 | 35 | 30 |
| NS | N(28)S(24) | 790.802 | 348.4 | 35 | 30 |
| NS | N(24)S(25) | 748.755 | 362.4 | 30 | 30 |
| NS | N(26)S(25) | 776.786 | 362.4 | 35 | 30 |
| NS | N(24)S(26) | 762.771 | 376.4 | 35 | 30 |
| NS | N(25)S(26) | 776.786 | 376.4 | 35 | 30 |
| NS | N(26)S(26) | 790.802 | 376.4 | 35 | 30 |

**Supplementary Table S3.** Quantitation transitions and parameters for each sphingomyelin analysed

| <b>Compound</b> | <b>Precursor ion (m/z)</b> | <b>Product ion (m/z)</b> | <b>Collision energy (eV)</b> | <b>Cone voltage (V)</b> |
|-----------------|----------------------------|--------------------------|------------------------------|-------------------------|
| SM-d31          | 734.666                    | 184.1                    | 26                           | 48                      |
| SM 32:1         | 675.536                    | 184.047                  | 20                           | 18                      |
| SM 33:1         | 689.552                    | 184.047                  | 20                           | 18                      |
| SM 34:2         | 701.552                    | 184.047                  | 20                           | 18                      |
| SM 34:1         | 703.568                    | 184.047                  | 20                           | 18                      |
| SM 34:0         | 705.583                    | 184.047                  | 20                           | 18                      |
| SM 35:1         | 717.583                    | 184.047                  | 20                           | 18                      |
| SM 36:2         | 729.583                    | 184.047                  | 20                           | 18                      |
| SM 36:1         | 731.599                    | 184.047                  | 20                           | 18                      |
| SM 37:1         | 745.615                    | 184.047                  | 20                           | 18                      |
| SM 38:2         | 757.615                    | 184.047                  | 20                           | 18                      |
| SM 38:1         | 759.63                     | 184.047                  | 20                           | 18                      |
| SM 39:1         | 773.646                    | 184.047                  | 20                           | 18                      |
| SM 40:2         | 785.656                    | 184.047                  | 20                           | 18                      |
| SM 40:1         | 787.662                    | 184.047                  | 20                           | 18                      |
| SM 40:0         | 789.677                    | 184.047                  | 20                           | 18                      |
| SM 41:2         | 799.662                    | 184.047                  | 20                           | 18                      |
| SM 41:1         | 801.677                    | 184.047                  | 20                           | 18                      |
| SM 42:3         | 811.662                    | 184.047                  | 20                           | 18                      |
| SM 42:2         | 813.677                    | 184.047                  | 20                           | 18                      |
| SM 42:1         | 815.693                    | 184.047                  | 20                           | 18                      |
| SM 43:1         | 829.708                    | 184.047                  | 20                           | 18                      |
| SM 44:2         | 841.708                    | 184.047                  | 20                           | 18                      |
| SM 44:1         | 843.724                    | 184.047                  | 20                           | 18                      |
